# Supplementary material
Source: publisher figshare collection journal article supplement (https://acs.figshare.com/ndownloader/files/16809449)
Supplement: Supplementary file 1 [file 16809449]

## Supporting Information

### **Mechanistic Understanding of Metal Phosphide Host for Sulfur Cathode in High-Energy-Density Lithium-Sulfur Batteries**

Jiadong Shen,<sup>†</sup> Xijun Xu,<sup>†</sup> Jun Liu,<sup>†,\*</sup> Zhengbo Liu,<sup>†</sup> Fangkun Li,<sup>†</sup> Renzong Hu,<sup>†</sup>

Jiangwen Liu,<sup>†</sup> Xianhua Hou,<sup>§</sup> Yuezhan Feng,<sup>‡</sup> Yan Yu<sup>‡,&\*</sup>, and Min Zhu<sup>†,\*</sup>

<sup>†</sup>School of Materials Science and Engineering and Guangdong Provincial Key Laboratory of Advanced Energy Storage Materials, South China University of Technology, Guangzhou, 510641, PR China

E-mail: [msjliu@scut.edu.cn](mailto:msjliu@scut.edu.cn); [memzhu@scut.edu.cn](mailto:memzhu@scut.edu.cn)

<sup>‡</sup> Hefei National Laboratory for Physical Sciences at the Microscale, Department of Materials Science and Engineering, Key Laboratory of Materials for Energy Conversion, Chinese Academy of Sciences, University of Science and Technology of China, Hefei, Anhui, 230026, China. E-mail: [yanyumse@ustc.edu.cn](mailto:yanyumse@ustc.edu.cn)

<sup>§</sup>Guangdong Provincial Key Laboratory of Quantum Engineering and Quantum Materials, School of Physics and Telecommunication Engineering, South China Normal University, Guangzhou 510006, PR China

<sup>‡</sup>Key Laboratory of Materials Processing and Mold (Zhengzhou University), Ministry of Education, Zhengzhou University, Zhengzhou 450002, China

<sup>&</sup>State Key Laboratory of Fire Science, University of Science and Technology of China, Hefei, Anhui, 230026, China.

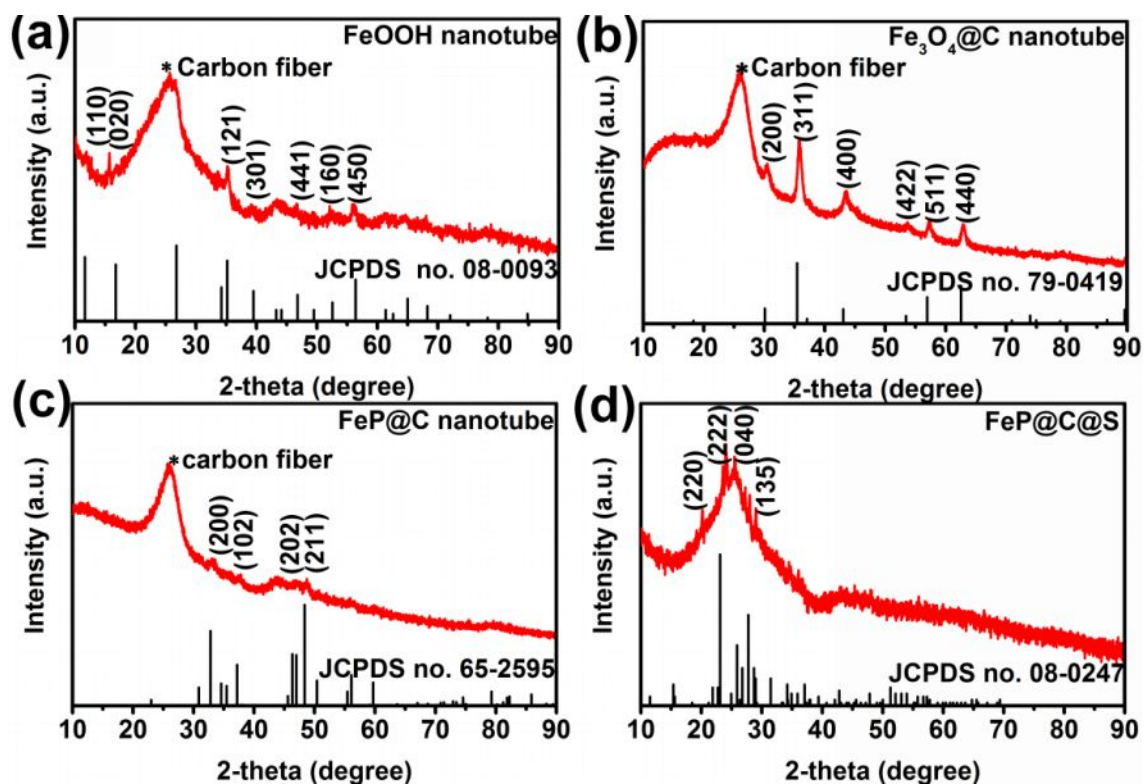

**Figure S1.** XRD patterns for self-supported films of FeOOH (a), Fe<sub>3</sub>O<sub>4</sub>@C (b), FeP@C (c) and FeP@C@S (d) nanotube arrays grown on CF substrate.

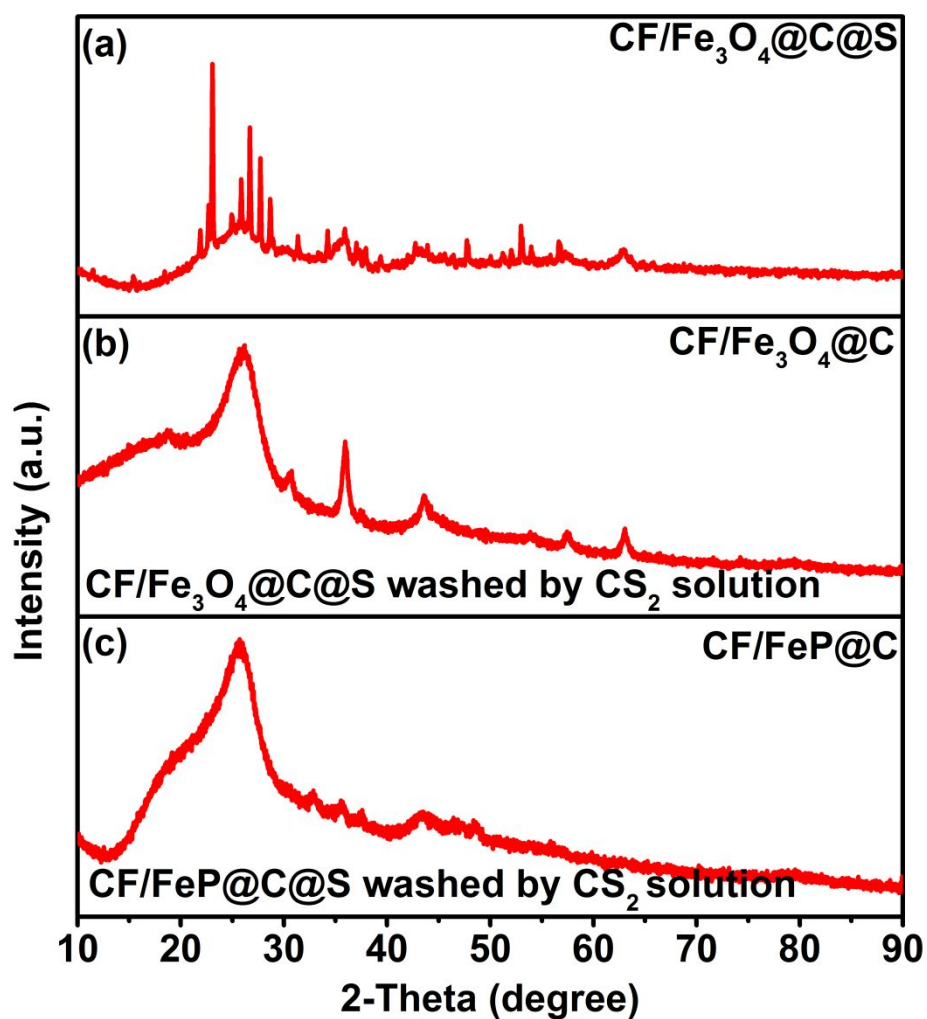

**Figure S2.** XRD patterns of CF/Fe<sub>3</sub>O<sub>4</sub>@C@S (a) CF/Fe<sub>3</sub>O<sub>4</sub>@C (b) and CF/FeP@C (c).

CF/Fe<sub>3</sub>O<sub>4</sub>@C and CF/FeP@C used for XRD testing were obtained by dissolving the sulfur *via* immersing the CF/Fe<sub>3</sub>O<sub>4</sub>@C@S and CF/FeP@C@S into CS<sub>2</sub> solution.

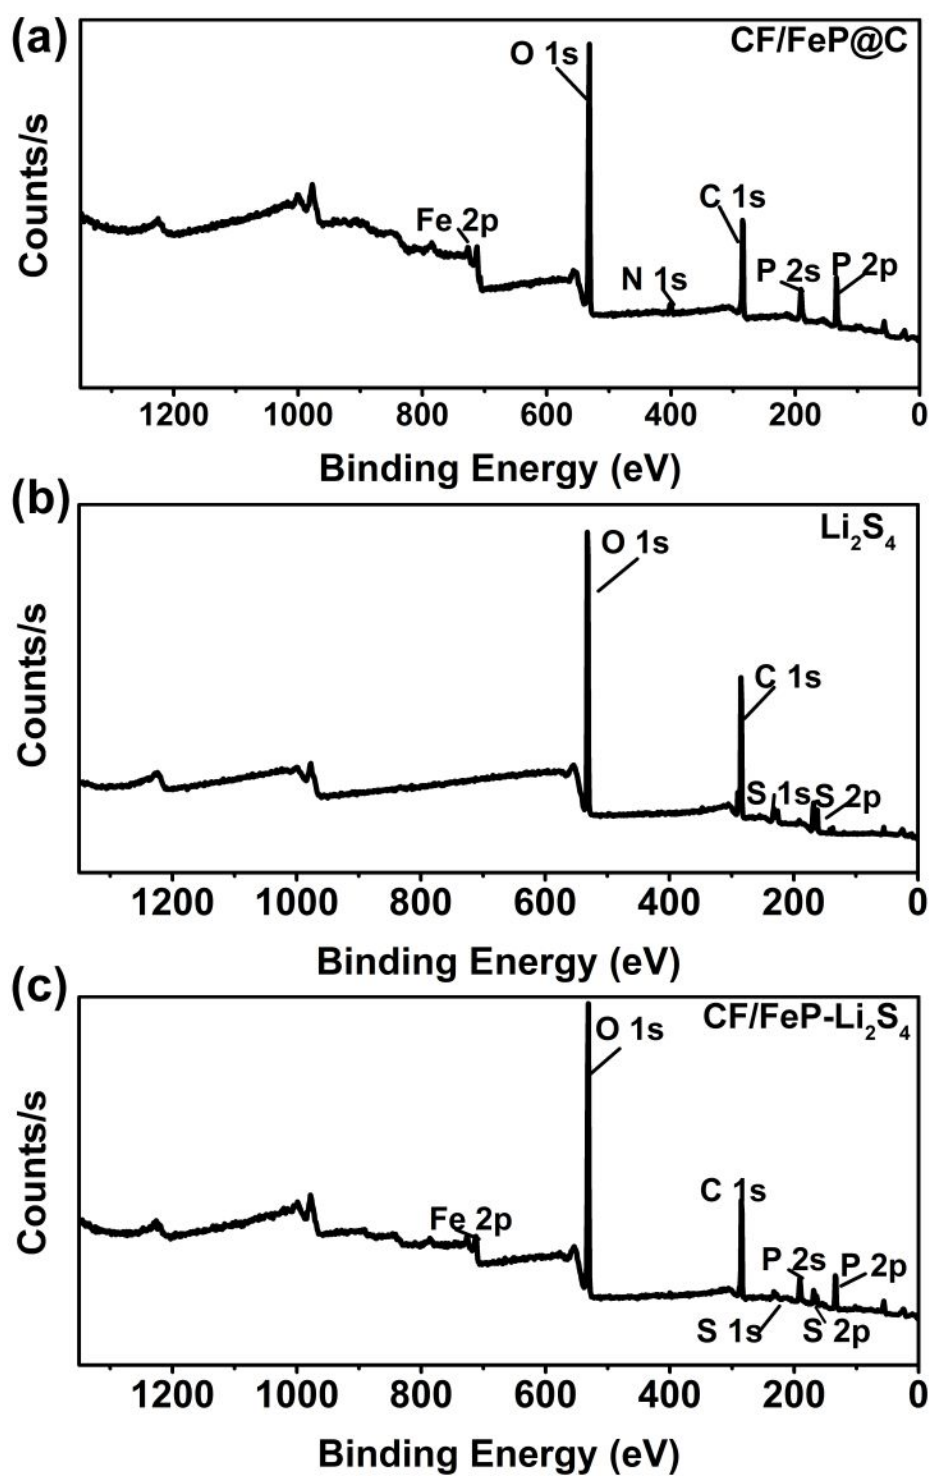

**Figure S3.** XPS survey-level scan spectra of CF/FeP@C (a),  $\text{Li}_2\text{S}_4$  powder (b) and CF/FeP@C- $\text{Li}_2\text{S}_4$  (c).

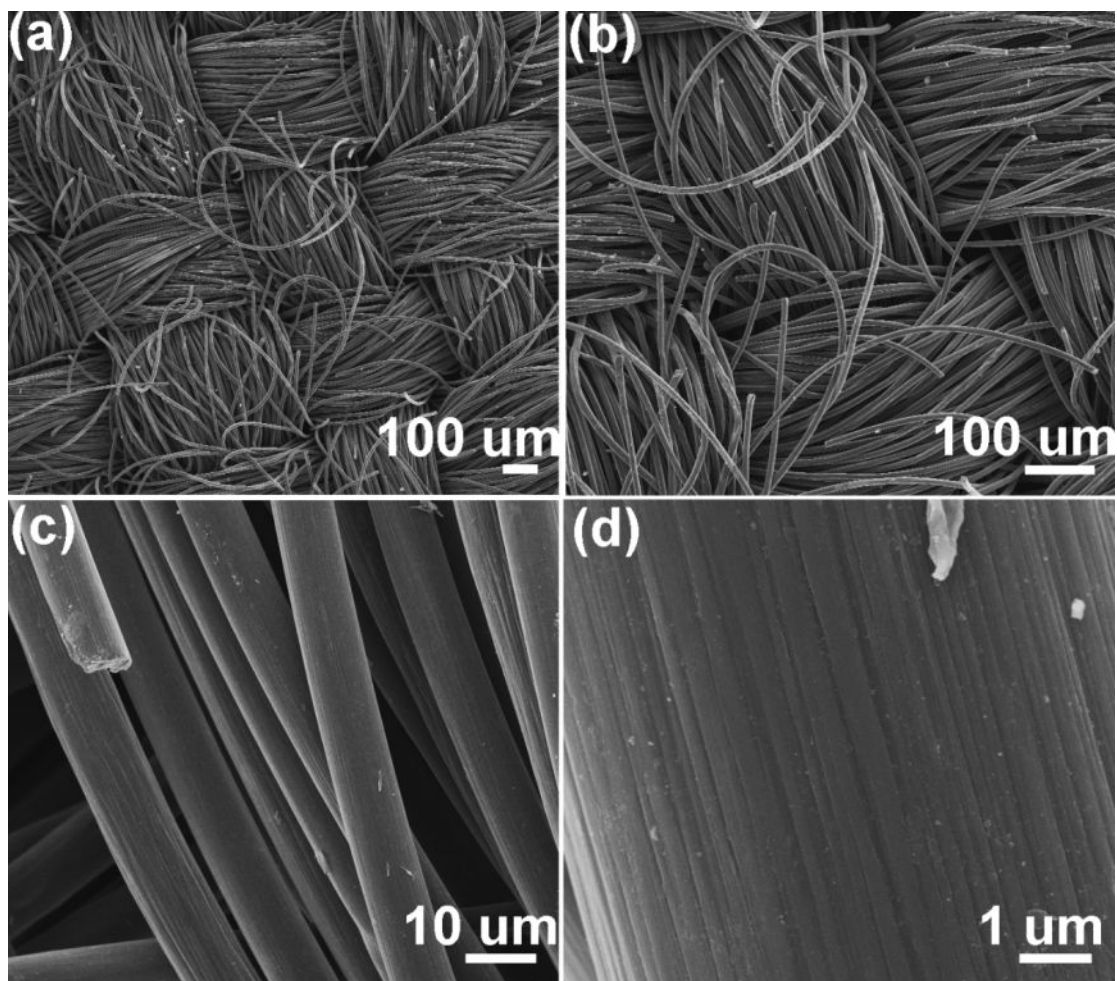

**Figure S4.** Low- and high-magnification SEM images of carbon cloth (WOS 1002).

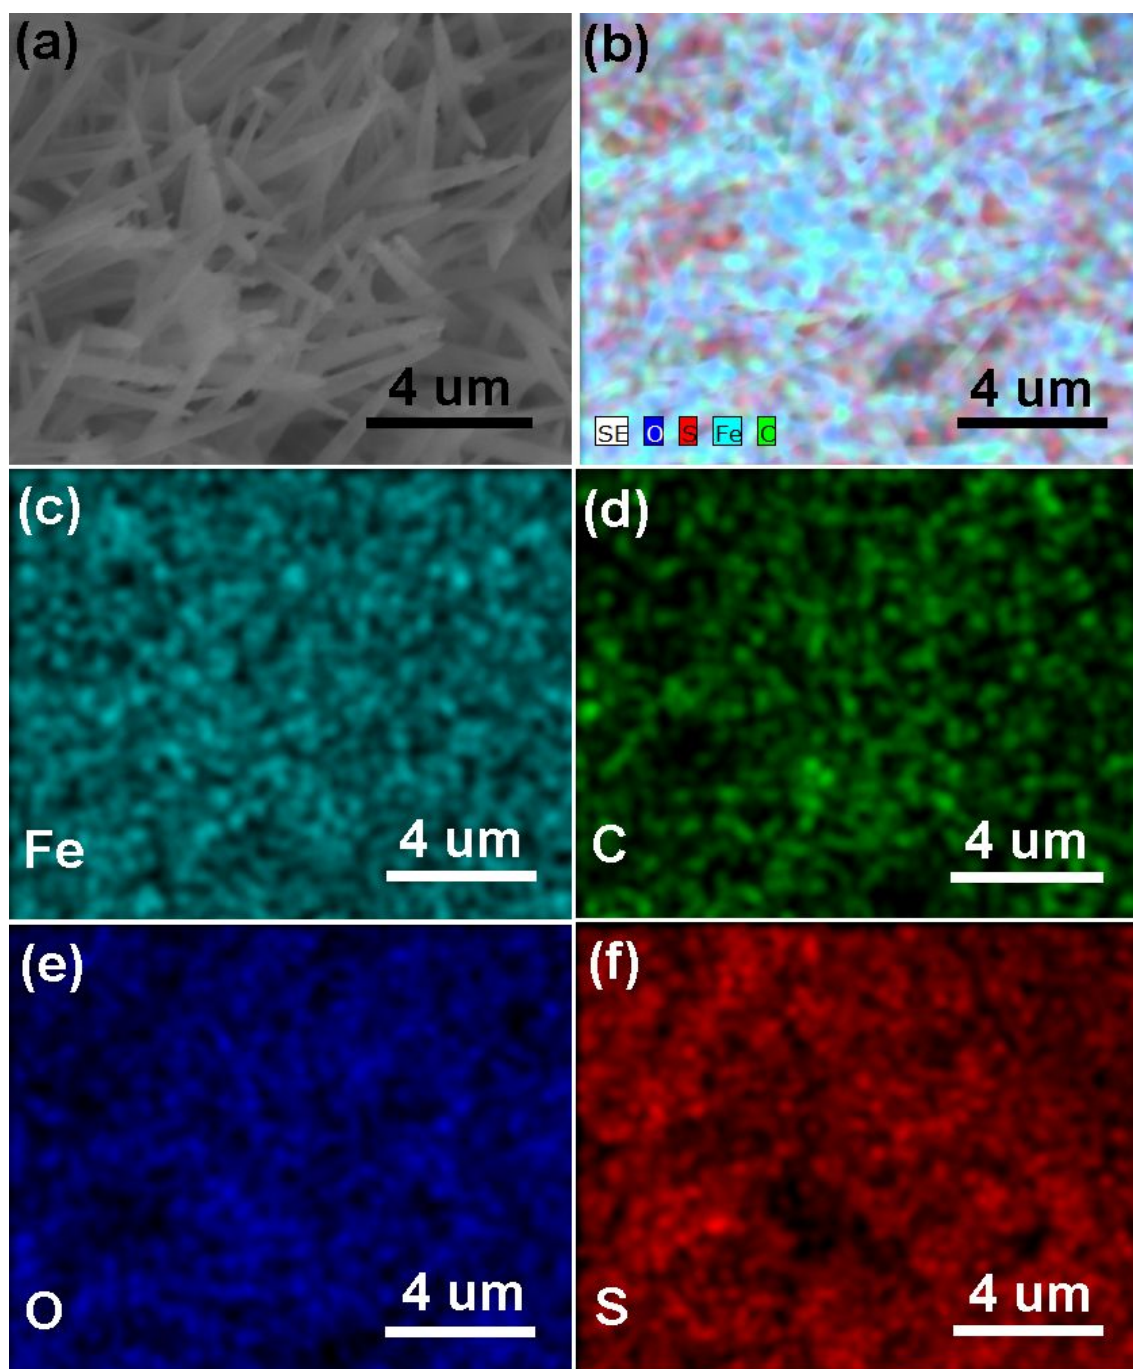

**Figure S5.** Element composition of the  $\text{Fe}_3\text{O}_4@\text{C}@\text{S}$  cathode: (a) low-magnification image of  $\text{Fe}_3\text{O}_4@\text{C}@\text{S}$ ; (b-f) the corresponding EDX elemental mapping images of overlap (b), iron (c), carbon (d), oxygen (e) and sulfur (f).



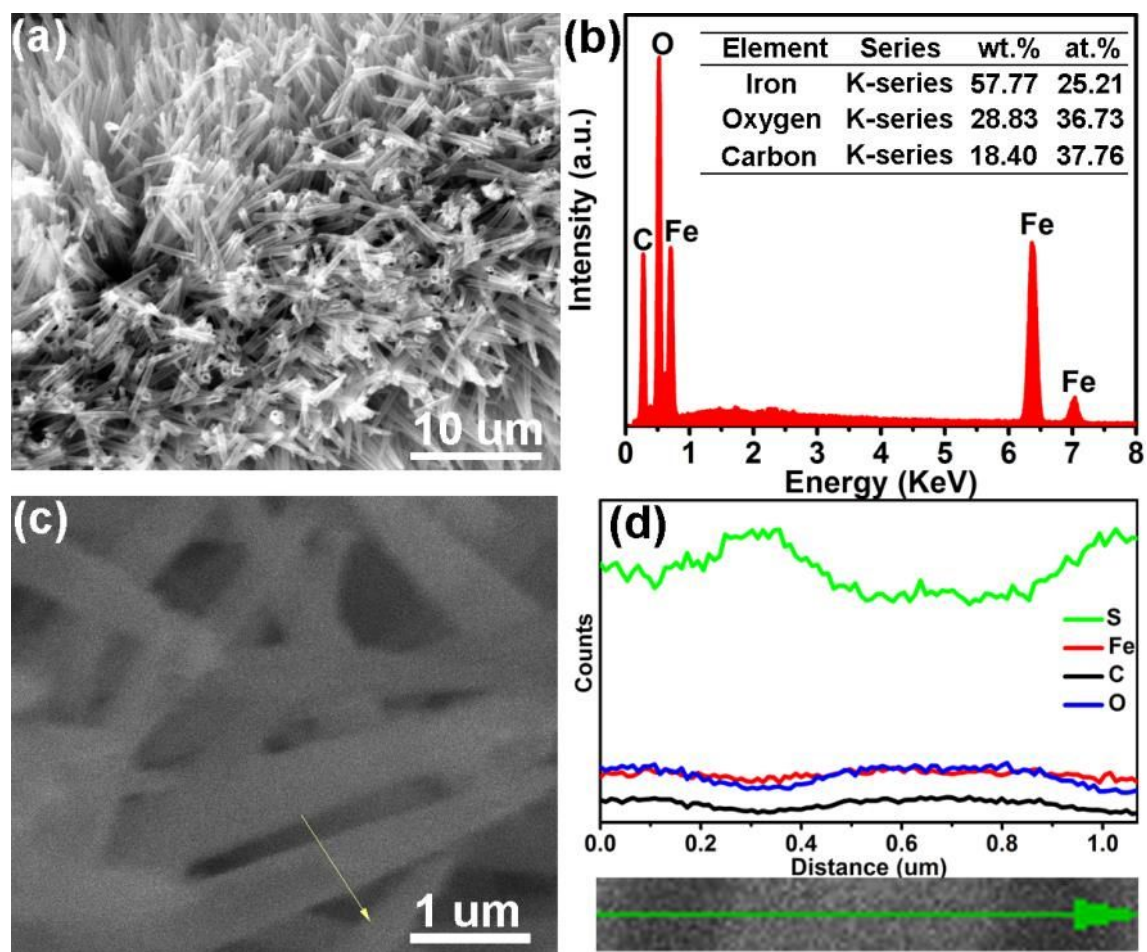

**Figure S6.** The elemental analysis of  $\text{Fe}_3\text{O}_4@\text{C}$  (a,b) and  $\text{Fe}_3\text{O}_4@\text{C}@\text{S}$  nanotube arrays (c,d): (a) low-magnification SEM image of  $\text{Fe}_3\text{O}_4@\text{C}$  nanoarrays; (b) the corresponding EDS spectrum of  $\text{Fe}_3\text{O}_4@\text{C}$  and the EDS data analysis of  $\text{Fe}_3\text{O}_4@\text{C}$  (insert); (c,d) high-magnification SEM image (c) and the corresponding elemental line profiles (d) across a  $\text{Fe}_3\text{O}_4@\text{C}@\text{S}$  nanotube.

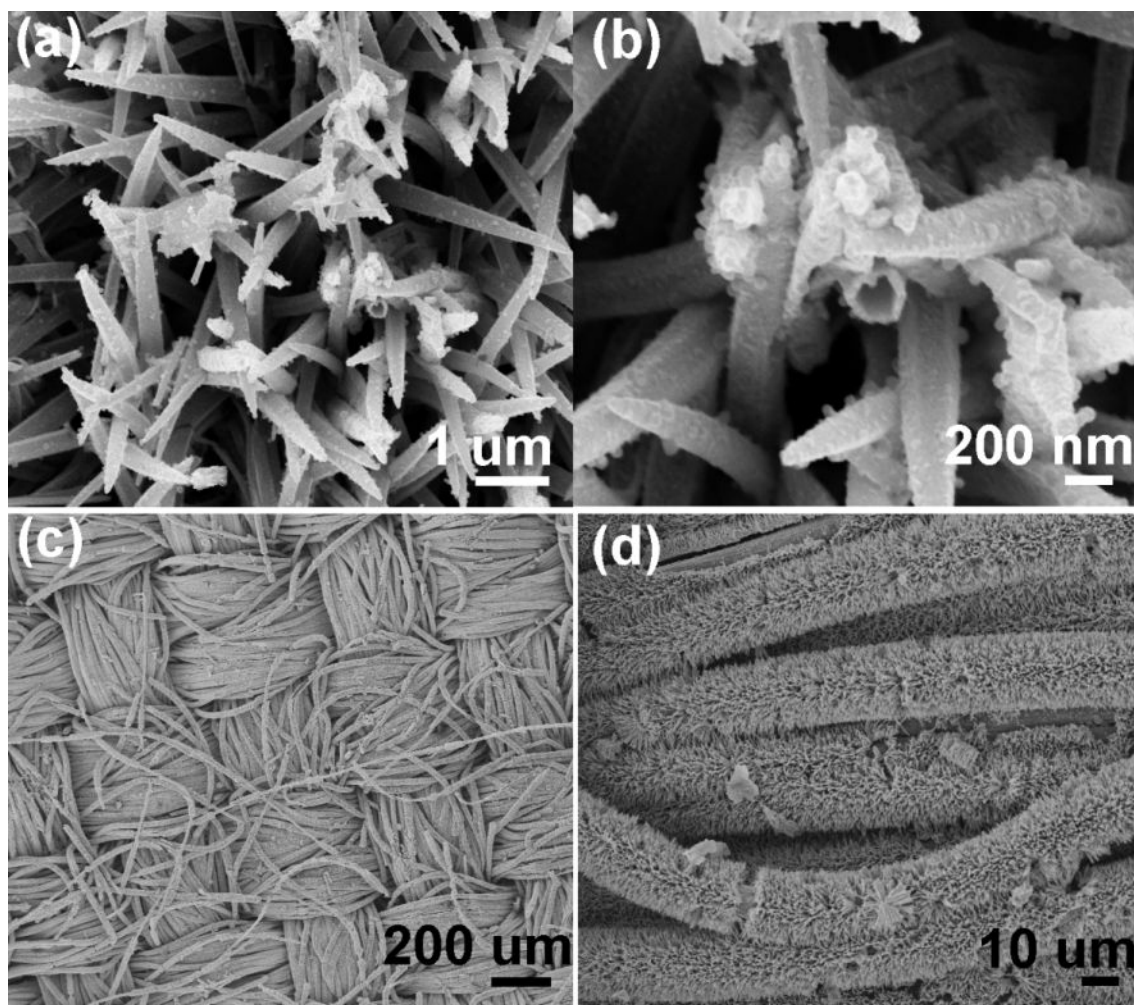

**Figure S7.** (a,b) Low- and high-magnification SEM images of CF/FeP@C; (c,d) low- and high-magnification SEM images of CF/FeP@C@S.



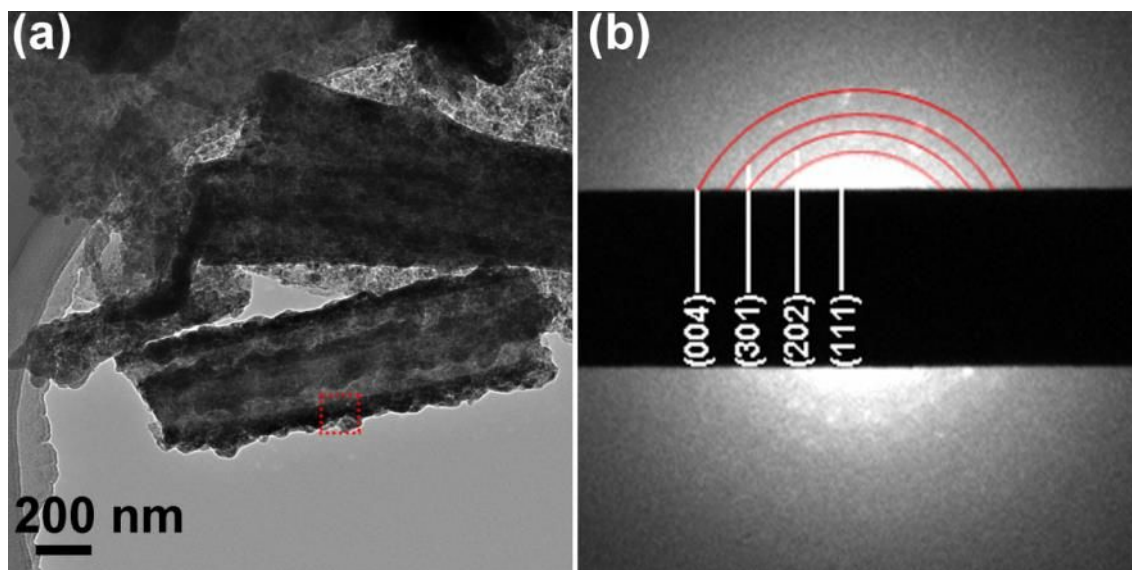

**Figure S8.** TEM images of carbon-coated FeP nanotubes (a) the corresponding SAED pattern of a single FeP@C nanotube (b).

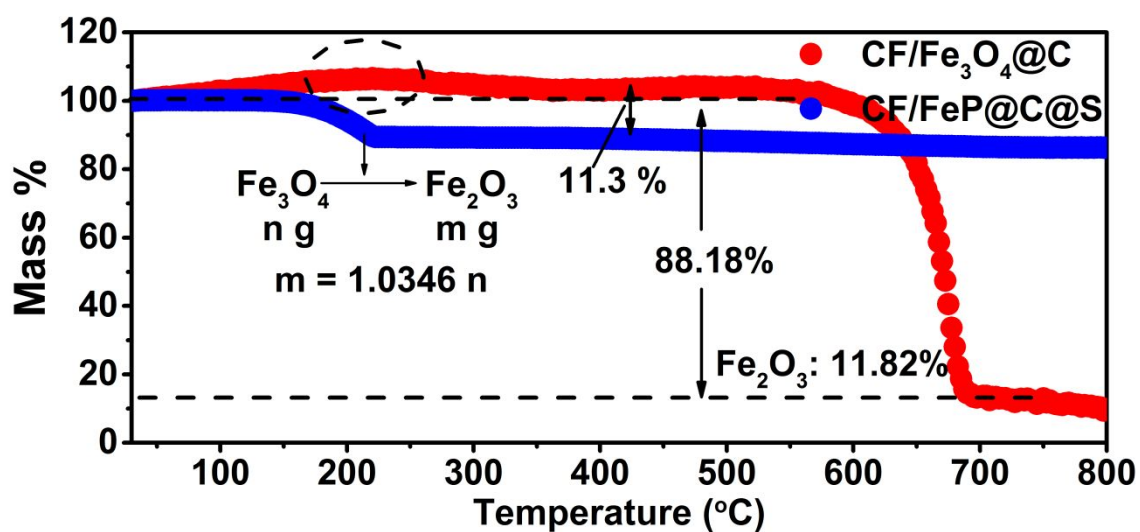

**Figure S9.** TGA curves of CF/Fe<sub>3</sub>O<sub>4</sub>@C and CF/FeP@C@S at a temperature ramp of 5 °C min<sup>-1</sup> in oxygen and argon atmosphere. According to the reaction of Fe<sub>3</sub>O<sub>4</sub> with O<sub>2</sub>, we can calculate the content of Fe<sub>3</sub>O<sub>4</sub> in Fe<sub>3</sub>O<sub>4</sub>@C is 86.1%, and sulfur content in CF/FeP@C@S was 1.56 mg cm<sup>-2</sup>.

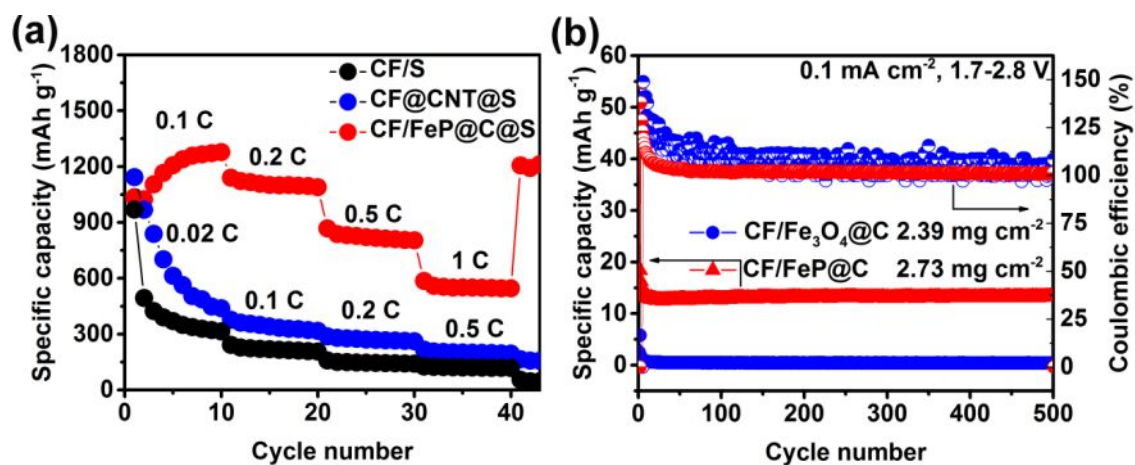

**Figure S10.** (a) The rate performance of CF/S, CF/CNT@S and CF/FeP@C@S; (b)

Li-ion storage performances of CF/Fe<sub>3</sub>O<sub>4</sub>@C and CF/FeP@C at 0.1 mA cm<sup>-2</sup> within

the voltage window of 1.7-2.8 V.

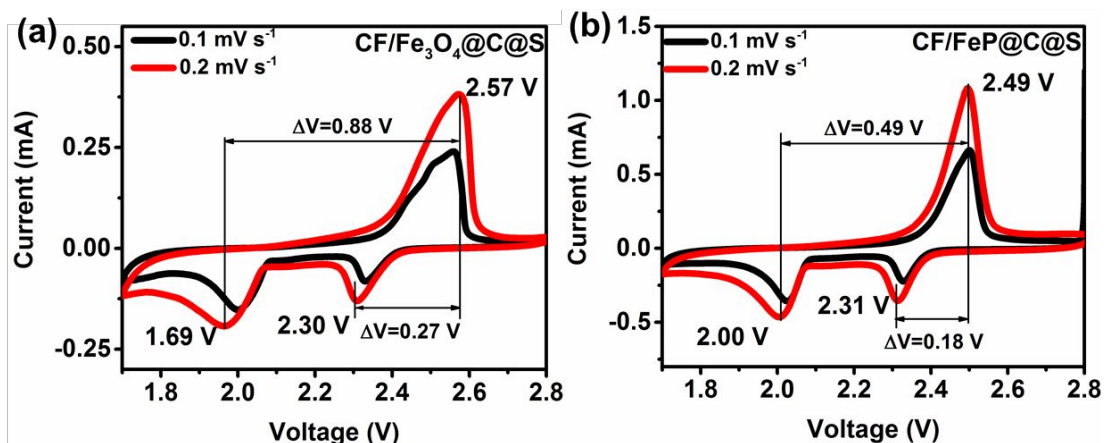

**Figure S11.** CV curves of CF/Fe<sub>3</sub>O<sub>4</sub>@C@S (a) and CF/FeP@C@S (b) cathodes at sweep rates of 0.1 and 0.2 mV s<sup>-1</sup>

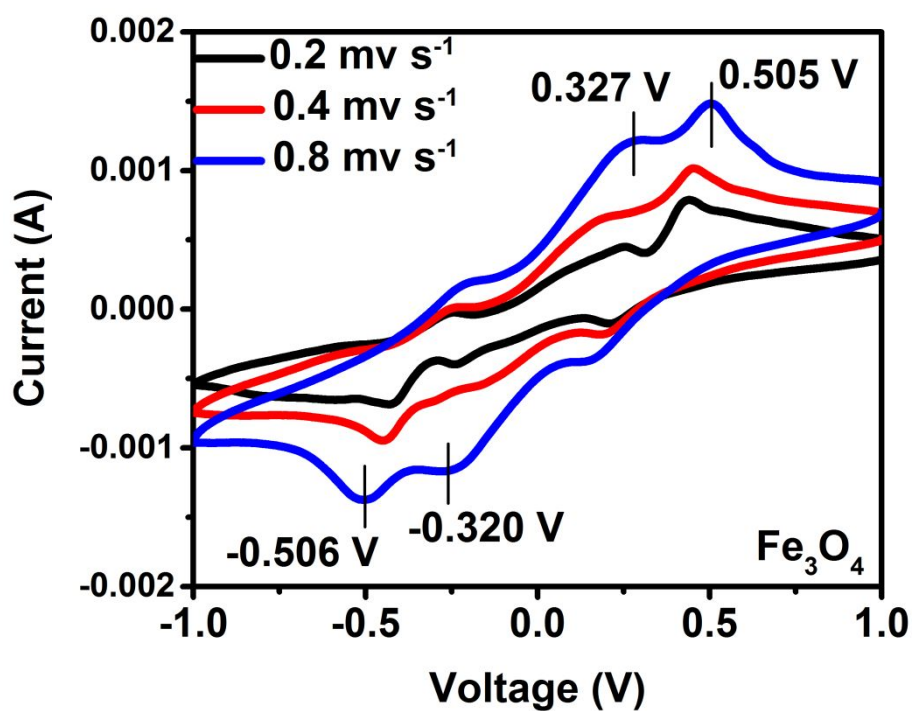

**Figure S12.** CV curves of CF/Fe<sub>3</sub>O<sub>4</sub>@C in a symmetric cell with Li<sub>2</sub>S<sub>4</sub> as the electrolyte with different scan rates (0.2–1.0 mV s<sup>-1</sup>).

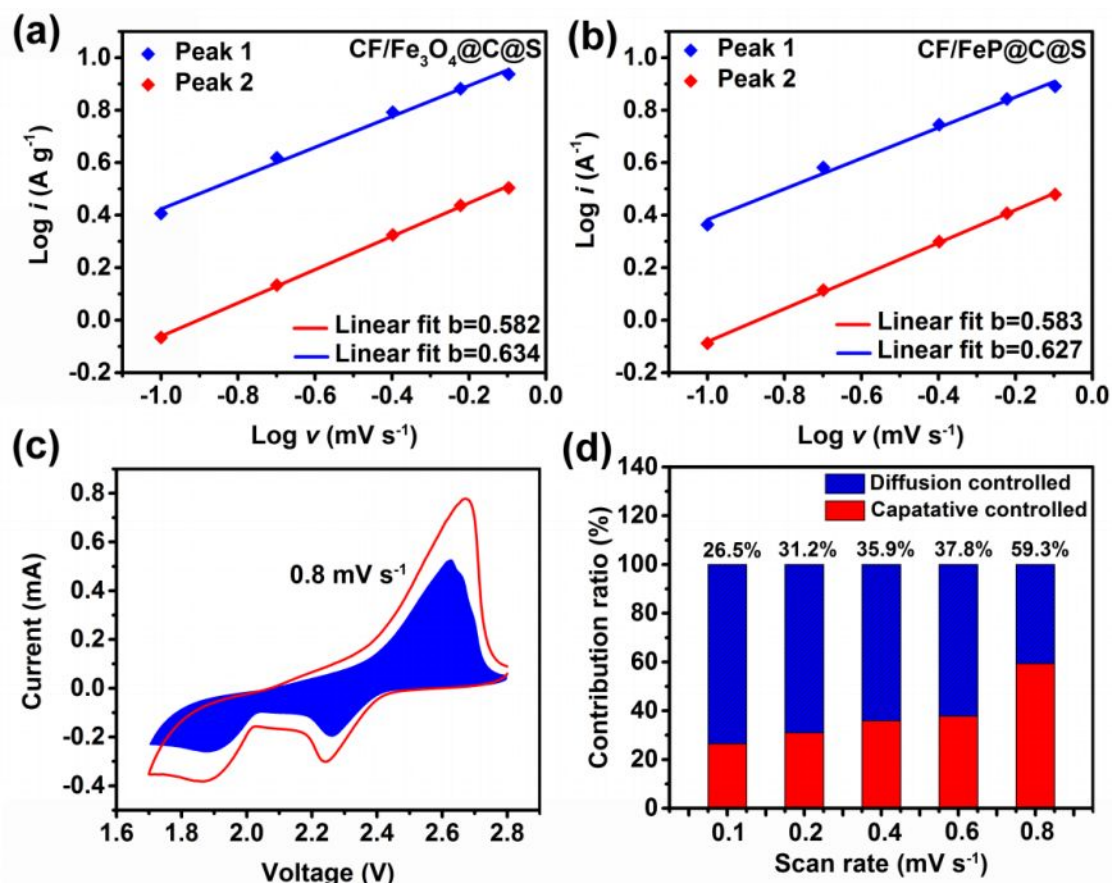

**Figure S13.** (a,b) The CV peak current ( $I_p$ ) logarithmically potted as a function of the sweep rate ( $v$ ) to give the slope of CF/Fe<sub>3</sub>O<sub>4</sub>@C@S (a) and CF/FeP@C@S (b); (c) the separation of the capacitive and diffusion currents at a scan rate of 0.8 mV s<sup>-1</sup>; the capacitive contribution to the total current is represented by the shaded region; (d) the normalized capacity contribution ratio of the capacitive- and diffusion-controlled charge versus scan rate.

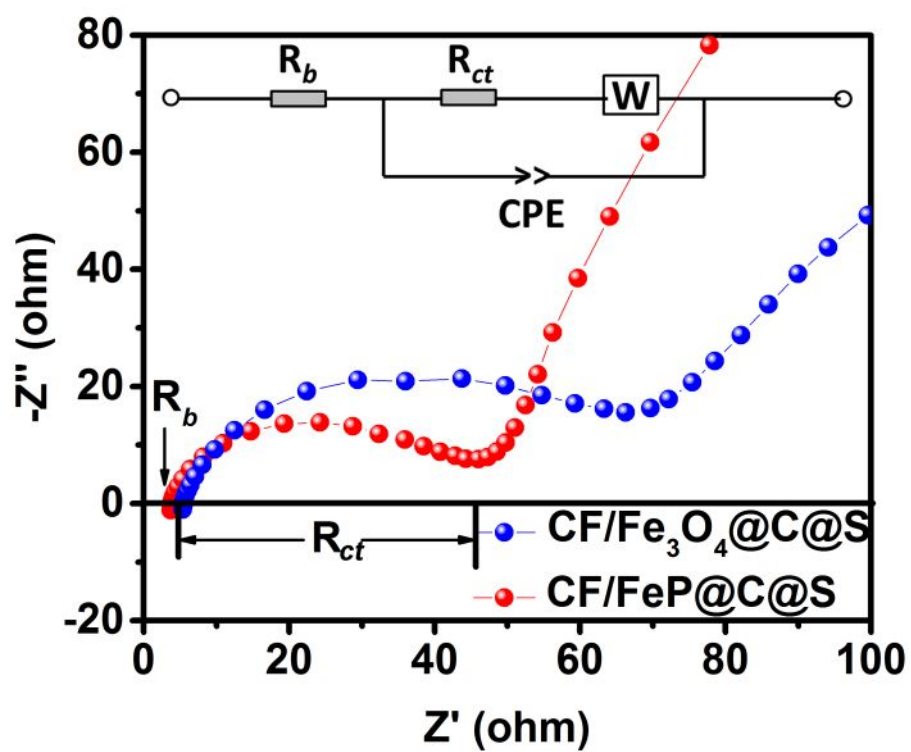

**Figure S14.** EIS spectra of Li-S batteries with  $CF/Fe_3O_4@C@S$  and  $CF/FeP@C@S$  as the cathode.



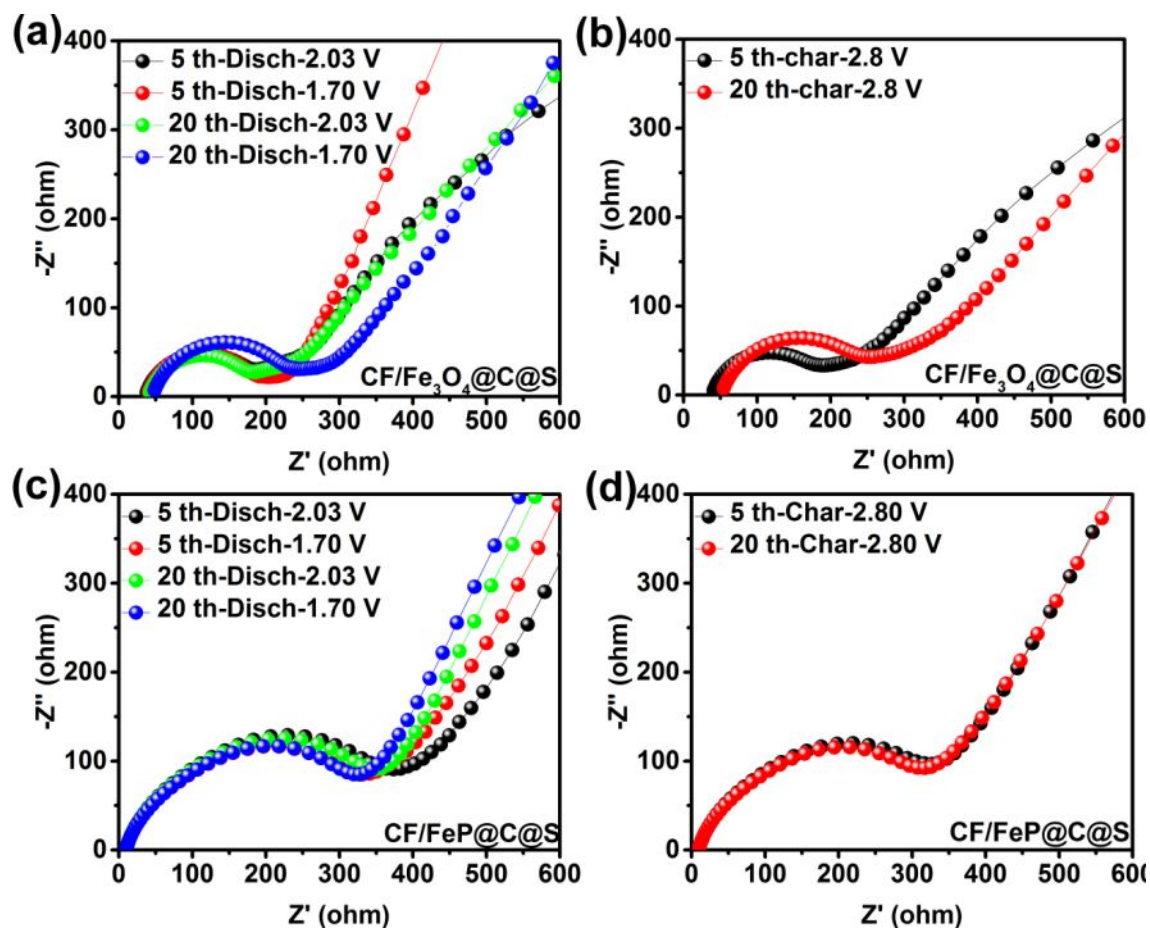

**Figure S15.** EIS plots of CF/Fe<sub>3</sub>O<sub>4</sub>@C@S (a,b) and CF/FeP@C@S (c,d) after different cycles at 1.0C.

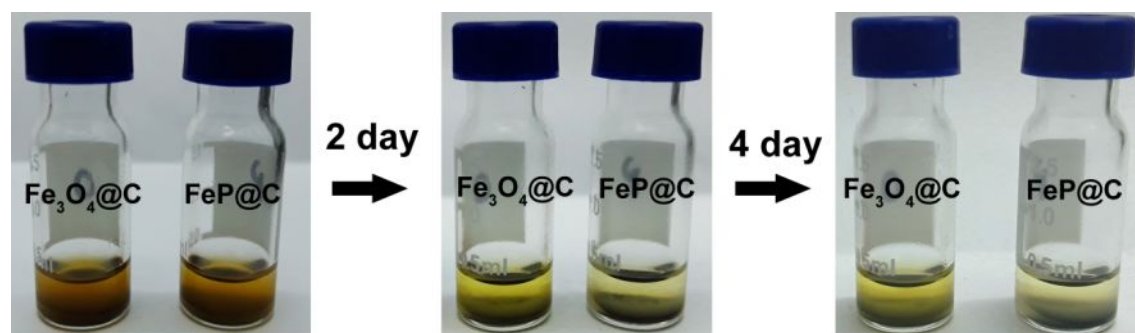

**Figure S16.** Adsorption ability tests of CF/Fe<sub>3</sub>O<sub>4</sub>@C and CF/FeP@C with Li<sub>2</sub>S<sub>4</sub> in four days.

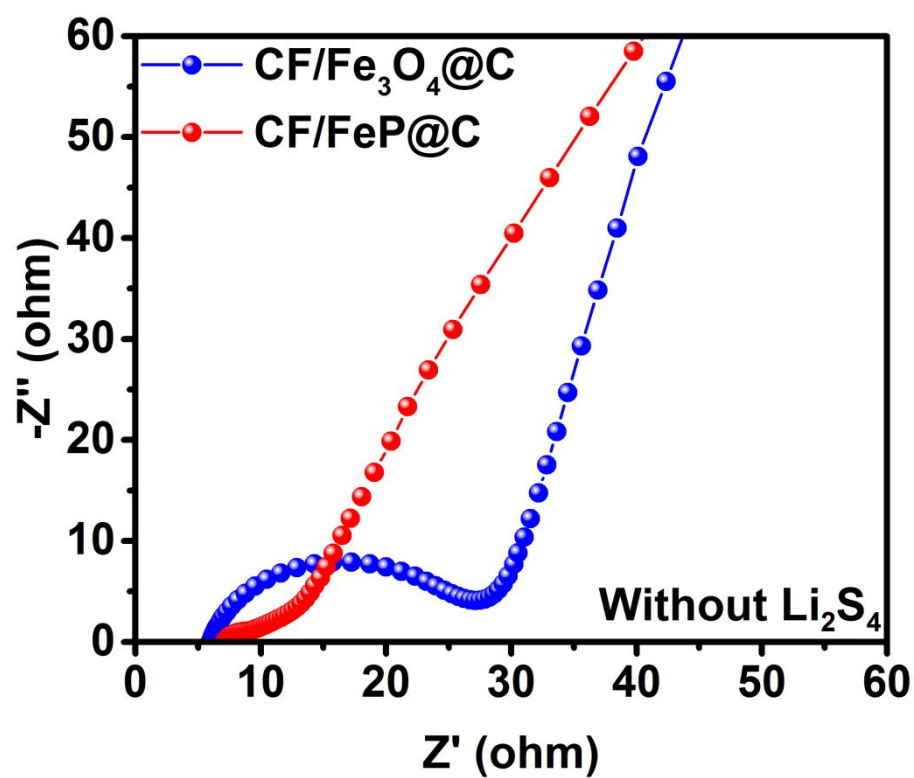

**Figure S17.** EIS spectra of the symmetric batteries with  $\text{CF/Fe}_3\text{O}_4@\text{C}$  and  $\text{CF/FeP}@\text{C}$  as the electrode (without  $\text{Li}_2\text{S}_4$  as electrolyte).

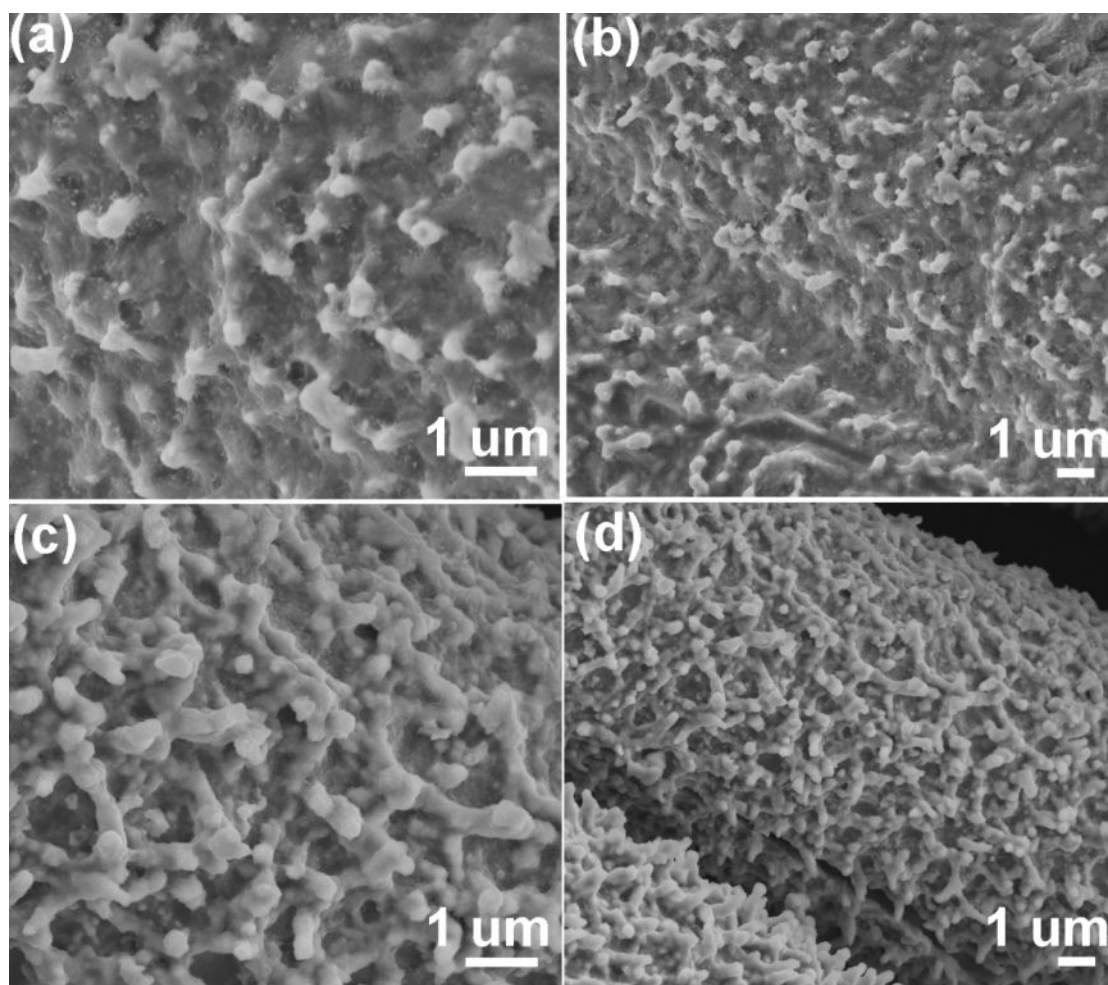

**Figure S18.** SEM images of CF/Fe<sub>3</sub>O<sub>4</sub>@C@S (a,b) and CF/FeP@C@S (c,d) after rates performance test (0.1–1.0 C).

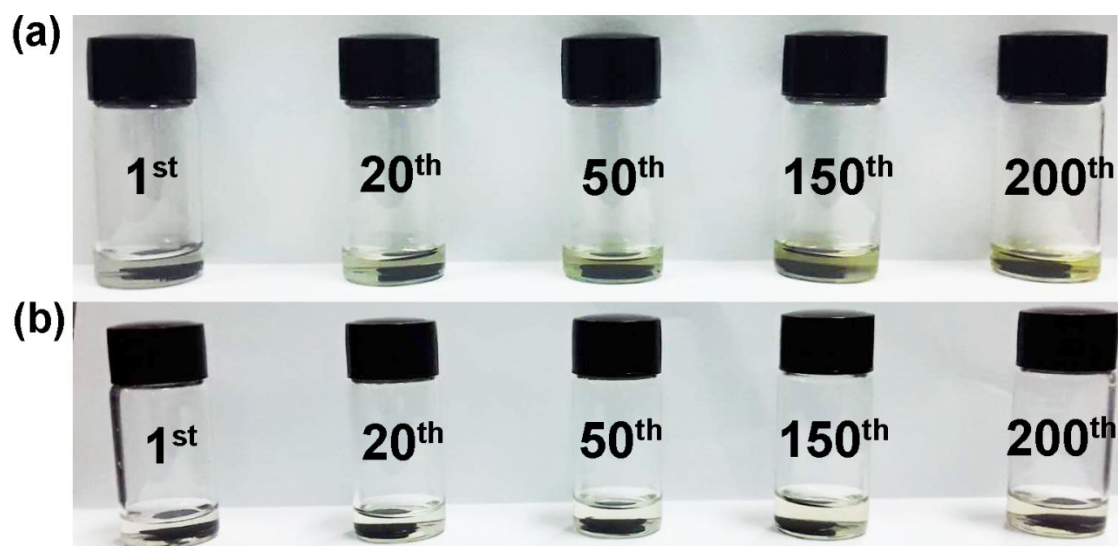

**Figure S19.** Optical images of diethyl carbonate (DEC) solutions with different cycles for CF/Fe<sub>3</sub>O<sub>4</sub>@C@S (a) and CF/FeP@C@S (b).

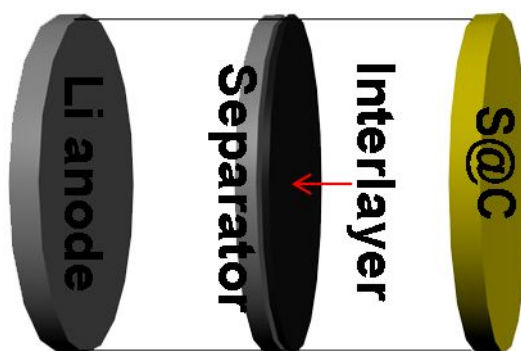

**Figure S20.** The schematic structure of Li-S batteries with CF/Fe<sub>3</sub>O<sub>4</sub>@C and CF/FeP as the interlayer.

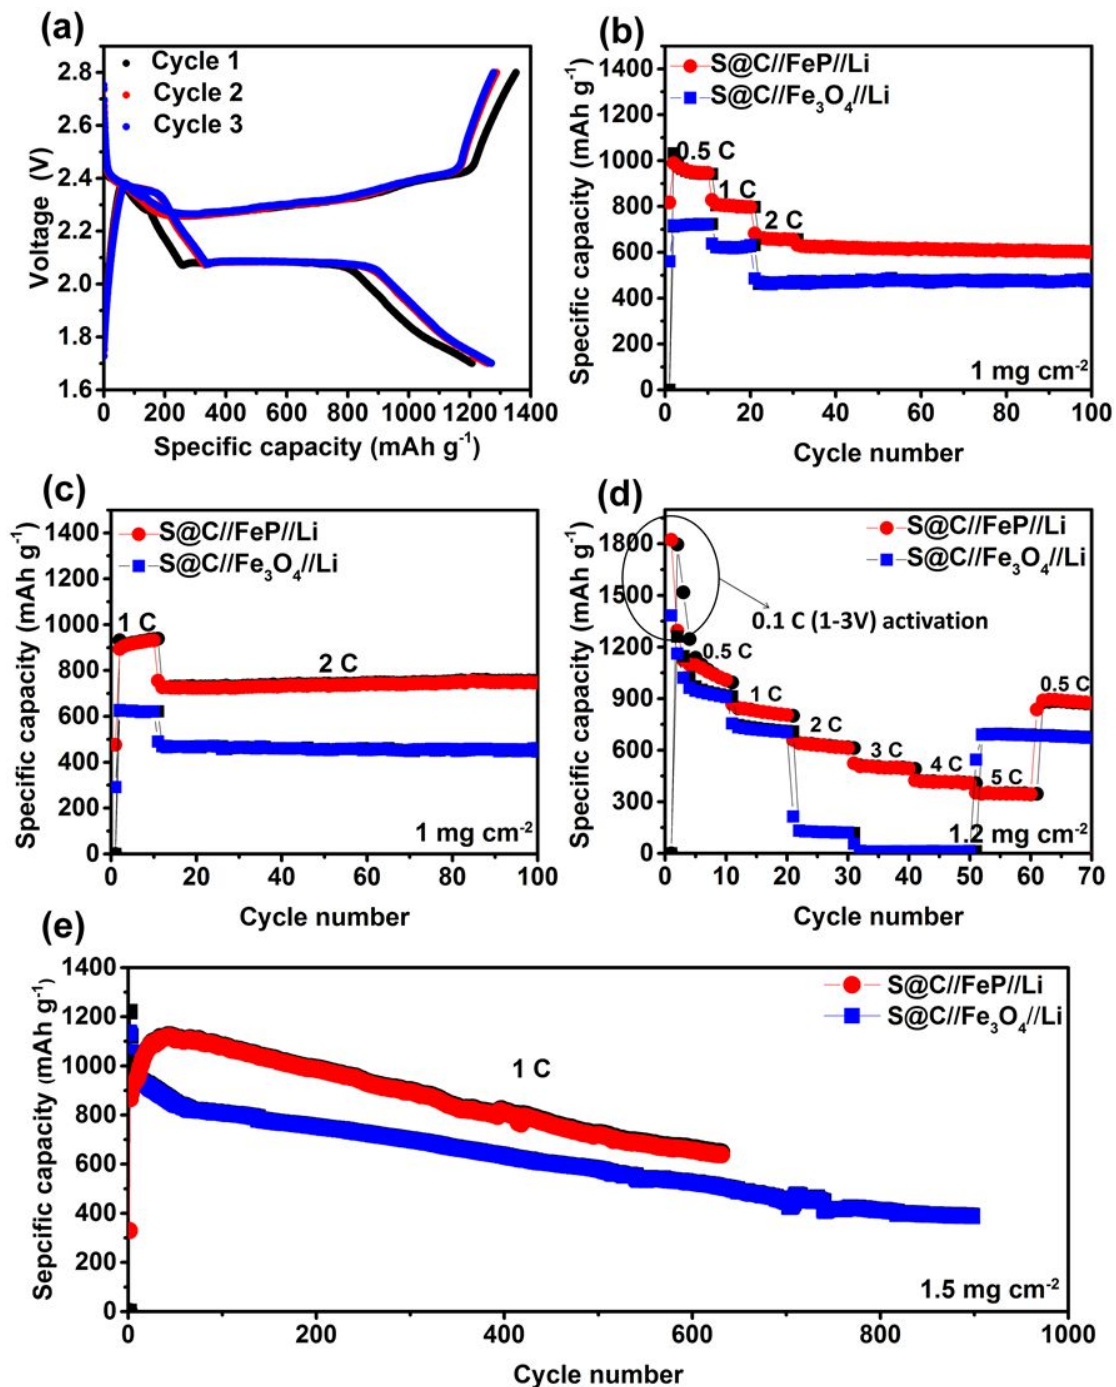

**Figure S21.** Detailed Li-S battery performances of CF/FeP@C and CF/Fe<sub>3</sub>O<sub>4</sub>@C as the interlayer for Li-S batteries: (a) the first three voltage-capacity curves at 0.1C. (b-c) the cycling performance at 2 C; (d) the rate performance at different rates (0.5–5 C); (e) the long cycling performance at 1C.



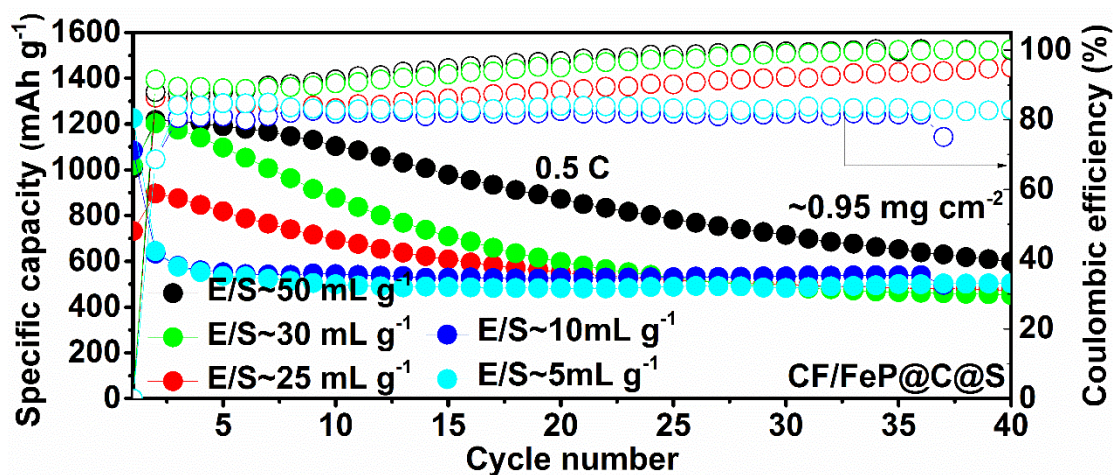

**Figure S22.** Comparison of the Coulombic efficiency and cycle performance of CF/FeP@C@S electrodes with different electrolyte (1.0 M LiTFSI in DME:DOL=1:1 Vol%) contents.

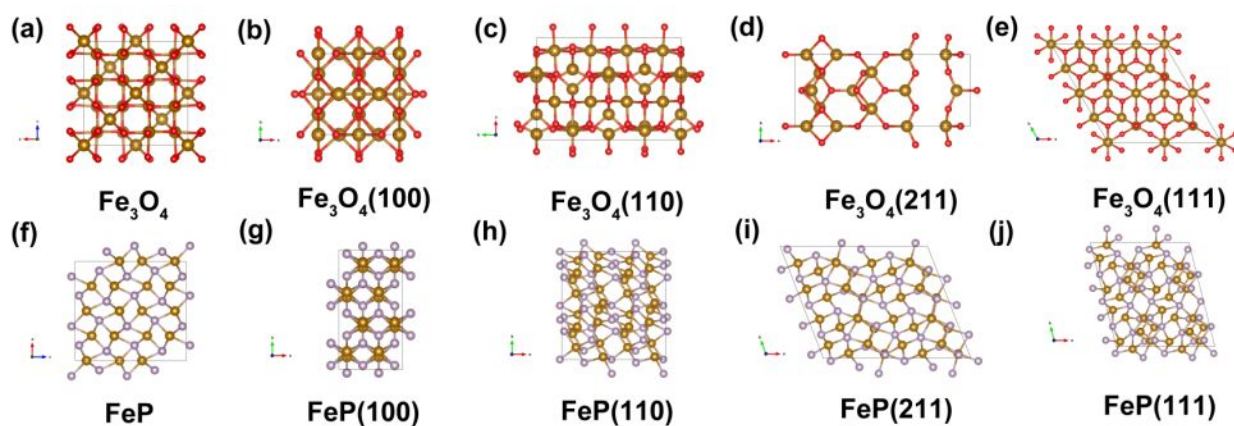

**Figure S23.** The geometry structures of (100), (110), (211) and (111) planes of  $\text{Fe}_3\text{O}_4$  (a-e) and FeP (f-j).

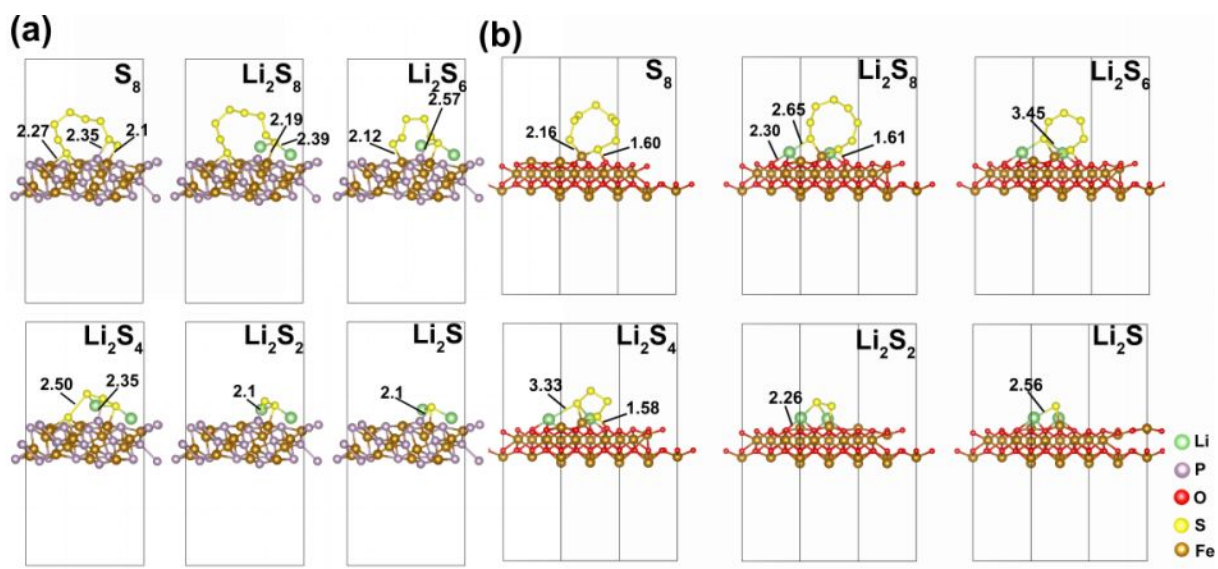

**Figure S24.** Adsorption configurations and energies of sulfur and LPS including  $\text{Li}_2\text{S}_8$ ,  $\text{Li}_2\text{S}_6$ ,  $\text{Li}_2\text{S}_4$ ,  $\text{Li}_2\text{S}_2$  and  $\text{Li}_2\text{S}$ .

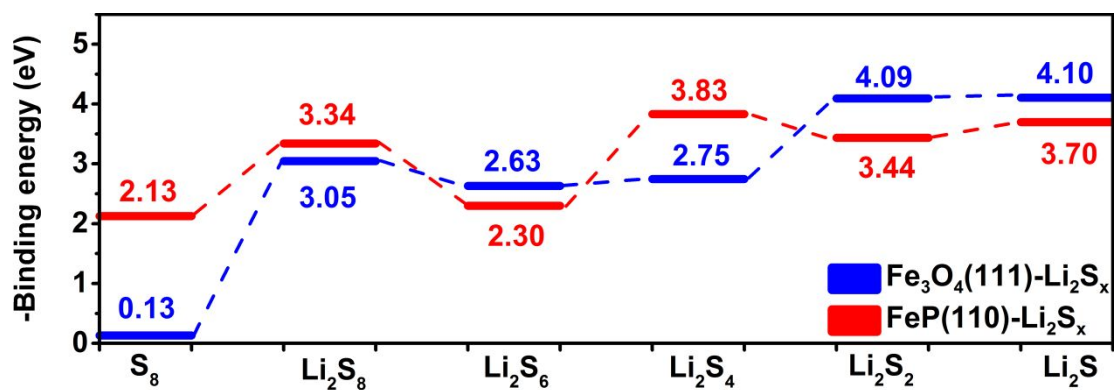

**Figure S25.** The binding energies of several LPS with (111) plane of  $\text{Fe}_3\text{O}_4$  and (110) plane of FeP.

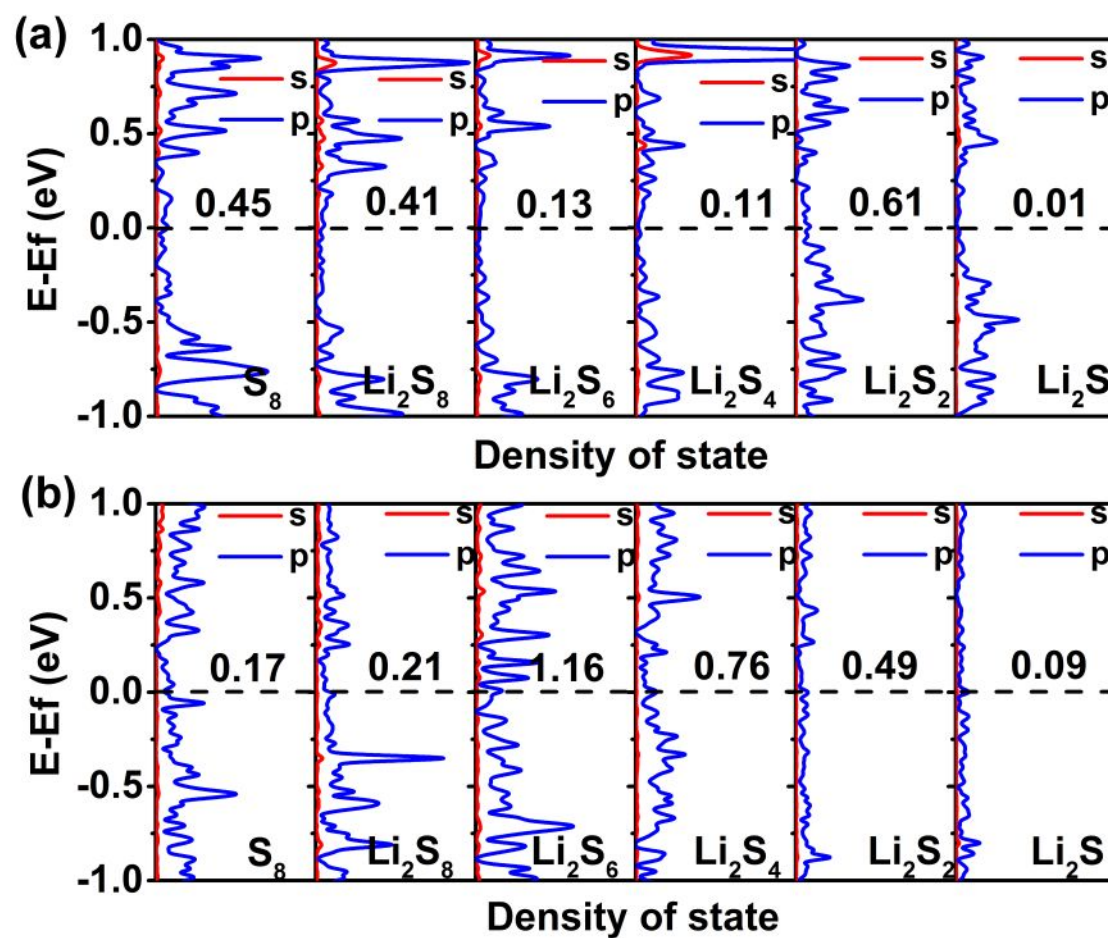

**Figure S26.** The density of states analysis of *s* and *p* bands of several LPS in  $\text{Fe}_3\text{O}_4$  (a) and FeP (b) systems.

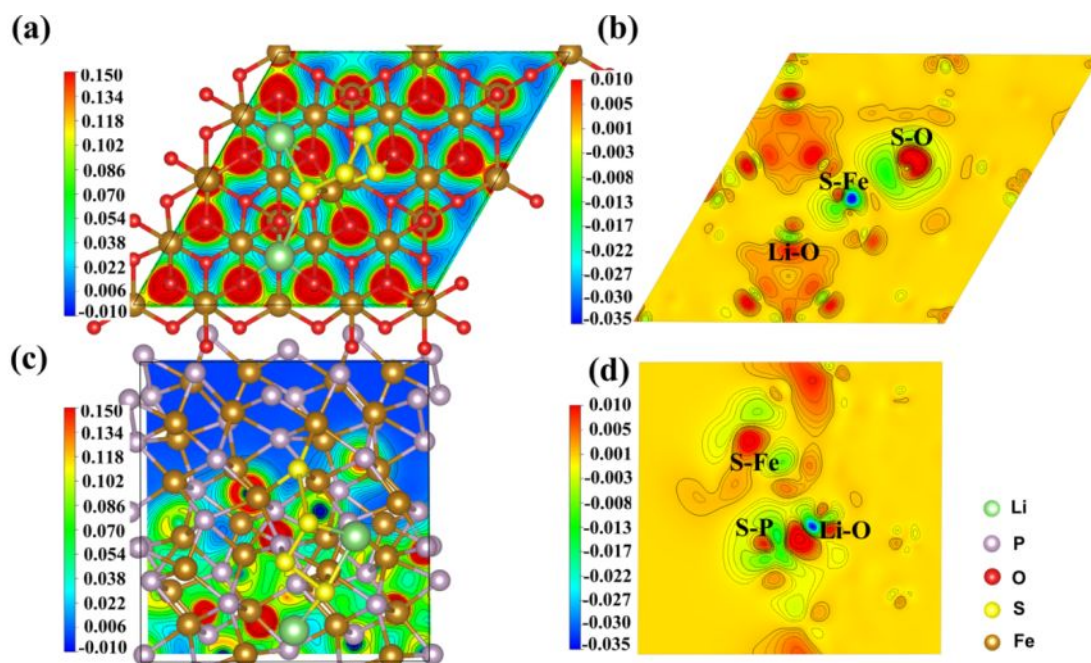

**Figure S27.** Surface electron density (a,c) and electron density difference (b,d) of  $\text{Fe}_3\text{O}_4$  (a,b) and FeP (c,d).



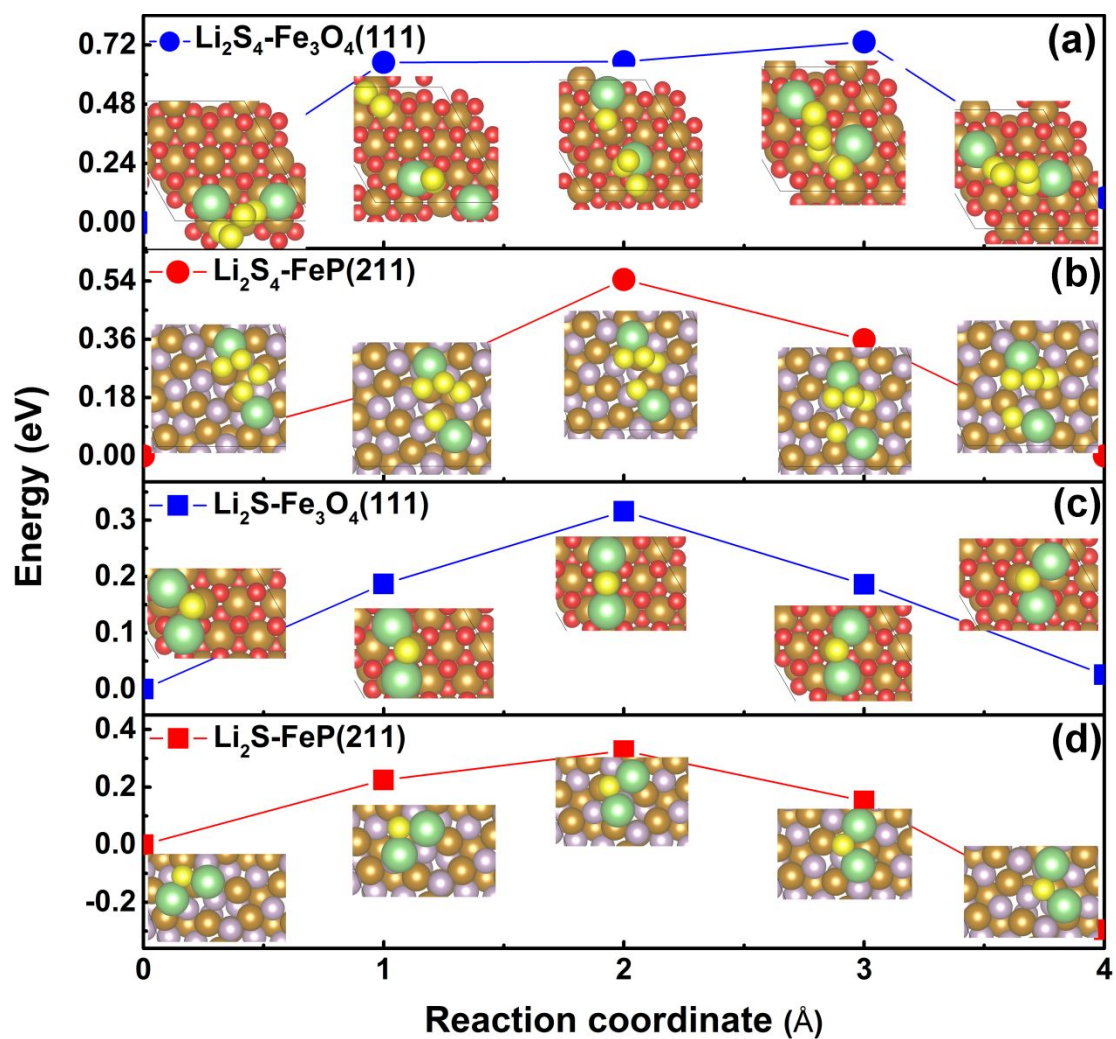

**Figure S28.** The diffusion energy barriers and corresponding optimized structures of  $\text{Li}_2\text{S}$  and  $\text{Li}_2\text{S}_4$  on  $\text{Fe}_3\text{O}_4$  and FeP interfaces.

**Table S1.** The surface energies and atom surface densities of main lattice planes of Fe<sub>3</sub>O<sub>4</sub> and FeP crystals.

| Surface        | Fe <sub>3</sub> O <sub>4</sub> | Fe <sub>3</sub> O <sub>4</sub> (100) | Fe <sub>3</sub> O <sub>4</sub> (110) | Fe <sub>3</sub> O <sub>4</sub> (111) | Fe <sub>3</sub> O <sub>4</sub> (211) |
|----------------|--------------------------------|--------------------------------------|--------------------------------------|--------------------------------------|--------------------------------------|
| $E_{sur}$ (eV) | -                              | 0.0436                               | 0.0488                               | 0.0320                               | 0.0468                               |
| $D_{atom}$     | -                              | 0.1136                               | 0.2009                               | 0.2050                               | 0.1623                               |
| Surface        | FeP                            | FeP (100)                            | FeP (110)                            | FeP (111)                            | FeP (211)                            |
| $E_{sur}$ (eV) | -                              | 0.1771                               | 0.1248                               | 0.1569                               | 0.0977                               |
| $D_{atom}$     | -                              | 0.1393                               | 0.1719                               | 0.1608                               | 0.1455                               |

The specific surface energies were calculated with the formula:  $E_{sur} = (E_{slab} - n E_{bulk})/2A$ , where  $E_{slab}$  is the energy of the slab,  $E_{bulk}$  is the energy of a unit cell,  $n$  is the number of unit cells and  $A$  is the area of the surface; atom surface densities were calculated with the formula  $D_{atom} = n/A$ ,  $n$  is number of atoms in the slap.



**Table S2.** The EIS fitting data of CF/Fe<sub>3</sub>O<sub>4</sub>@C@S and CF/FeP@C@S cathodes at different discharge stages.

| Batteries cycle<br>numbers<br>(Discharge to 2.03 V) | CF/Fe <sub>3</sub> O <sub>4</sub> @C@S |          | CF/FeP@C@S |          |
|-----------------------------------------------------|----------------------------------------|----------|------------|----------|
|                                                     | $R_b$                                  | $R_{ct}$ | $R_b$      | $R_{ct}$ |
| Without cycling                                     | 6.84                                   | 75.82    | 3.49       | 42.06    |
| After 5 cycles                                      | 44.59                                  | 138.2    | 13.6       | 200.7    |
| After 20 cycles                                     | 49.1                                   | 131.6    | 13.67      | 206.2    |
| Batteries cycle<br>numbers<br>(Discharge to 1.70 V) | CF/Fe <sub>3</sub> O <sub>4</sub> @C@S |          | CF/FeP@C@S |          |
|                                                     | $R_b$                                  | $R_{ct}$ | $R_b$      | $R_{ct}$ |
| After 5 cycles                                      | 46.51                                  | 134      | 13.65      | 203.4    |
| After 20 cycles                                     | 57.34                                  | 176.7    | 13.4       | 182.7    |
| Batteries cycle<br>numbers<br>(Charge to 2.8 V)     | CF/Fe <sub>3</sub> O <sub>4</sub> @C@S |          | CF/FeP@C@S |          |
|                                                     | $R_b$                                  | $R_{ct}$ | $R_b$      | $R_{ct}$ |
| After 5 cycles                                      | 47.56                                  | 134.7    | 13.18      | 163.7    |
| After 20 cycles                                     | 63.75                                  | 177.6    | 13.17      | 161.5    |

**Table S3.** The EIS fitting data of CF/Fe<sub>3</sub>O<sub>4</sub>@C and CF/FeP@C symmetric cells with/without Li<sub>2</sub>S<sub>4</sub> solution.

| With/without Li <sub>2</sub> S <sub>4</sub> | CF/Fe <sub>3</sub> O <sub>4</sub> @C |                       | CF/FeP@C             |                       |
|---------------------------------------------|--------------------------------------|-----------------------|----------------------|-----------------------|
|                                             | <i>R<sub>b</sub></i>                 | <i>R<sub>ct</sub></i> | <i>R<sub>b</sub></i> | <i>R<sub>ct</sub></i> |
| With Li <sub>2</sub> S <sub>4</sub>         | 11.59                                | 25.54                 | 10.11                | 13.43                 |
| Without Li <sub>2</sub> S <sub>4</sub>      | 6.329                                | 14.57                 | 7.154                | 1.324                 |
